# Supplementary material for: Epstein-Barr Virus-Encoded LMP1 Interacts with FGD4 to Activate Cdc42 and Thereby Promote Migration of Nasopharyngeal Carcinoma Cells
Source: PLOS journal article supplement (doi:10.1371/journal.ppat.1002690), 2012-05-10
Supplement: S6 (10.1371/journal.ppat.1002690.s006) [file journal.ppat.1002690.s006]

Table S1. Functional characterization of FGD4 domains and their respective effects on LMP1-mediated Cdc42 activation

|                                                 | FGD4 constructs |              |          |                 |             |
|-------------------------------------------------|-----------------|--------------|----------|-----------------|-------------|
|                                                 | Full length     | $\Delta$ FAB | FAB-DH   | PH1-2           | $\Delta$ DH |
| Activation of Cdc42 <i>in vivo</i> <sup>a</sup> | Yes             | Yes          | Impaired | Impaired        | Impaired    |
| Enhanced function of LMP1 <sup>b</sup>          | Yes             | Yes          | Impaired | Impaired        | Impaired    |
| Association with LMP1 <sup>c</sup>              | Yes             | Yes          | Impaired | Yes             | Yes         |
| Association with Cdc42 <sup>b</sup>             | Yes             | Yes          | Yes      | Impaired        | Impaired    |
| Self-association with FGD4 <sup>e</sup>         | Yes             | Yes          | Yes      | ND <sup>f</sup> | Yes         |

<sup>a</sup> Activation of Cdc42 in NPC cells determined by GST-CBD-pulldown assays.

<sup>b</sup> LMP1-mediated Cdc42 activation was elevated by co-expression with individual FGD4 construct in NPC cells.

<sup>c</sup> Demonstrated by co-immunoprecipitation assays in NPC cells or *in vitro* GST-FGD4- pulldown assays.

<sup>d</sup> Demonstrated by co-immunoprecipitation assays in NPC cells.

<sup>e</sup> Demonstrated by co-immunoprecipitation assays in NPC cells.

<sup>f</sup> Not determined.
